# Supplementary material for: Understanding the fundamentals of redox mediators in Li–O2 batteries: a case study on nitroxides
Source: Royal Society of Chemistry journal article supplement (doi:10.1039/c5cp04505c), 2015-01-01
Supplement: c5cp04505c1.pdf [file c5cp04505c1.pdf]

## Supporting Information: Understanding the Fundamentals of Redox Mediators in Li-O<sub>2</sub> Batteries: A Case Study on Nitroxides

Benjamin J. Bergner,<sup>a</sup> Christine Hofmann,<sup>b</sup> Adrian Schürmann,<sup>a</sup> Daniel Schröder,<sup>a</sup> Klaus Pepler,<sup>a</sup> Peter R. Schreiner<sup>b</sup> and Jürgen Janek<sup>\*a</sup>

*a.* Institute for Physical Chemistry, Justus Liebig University Giessen, Heinrich-Buff Ring 17, 35392 Giessen

*b.* Institute for Organic Chemistry, Justus Liebig University Giessen, Heinrich-Buff Ring 17, 35392 Giessen

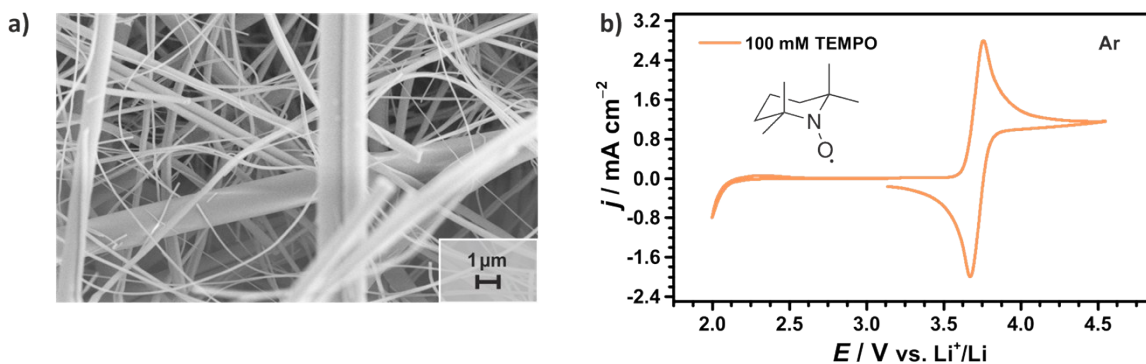

**Fig. S1a)** SEM image of the porous separator (Whatman GF/A) after sputter coating with platinum, obtained with a Merlin high-resolution Schottky field-emission microscope (Zeiss SMT); **b)** Cyclic voltammogram of 100 mM TEMPO in 1 M LiTFSI/diglyme under argon atmosphere ( $p = 1$  bar); obtained in a setup according to Fig. 1 with a scan speed of 5 mV s<sup>-1</sup>.

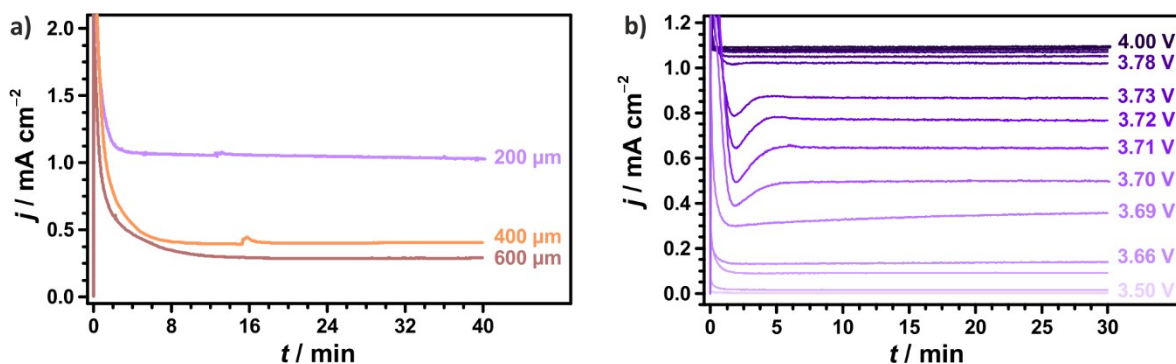

**Fig. S2a)** Potentiostatic measurements of 100 mM TEMPO in 1 M LiTFSI/diglyme using **a)** different interelectrode distances  $d$  and a fixed cathodic potential  $E = 3.95$  V vs. Li<sup>+</sup>/Li or **b)** different cathodic potentials  $E$  and a fixed interelectrode distance  $d = 200$  μm; all data were obtained with a GC working electrode, a LFP counter electrode and a lithium reference electrode, compare Fig. 1.

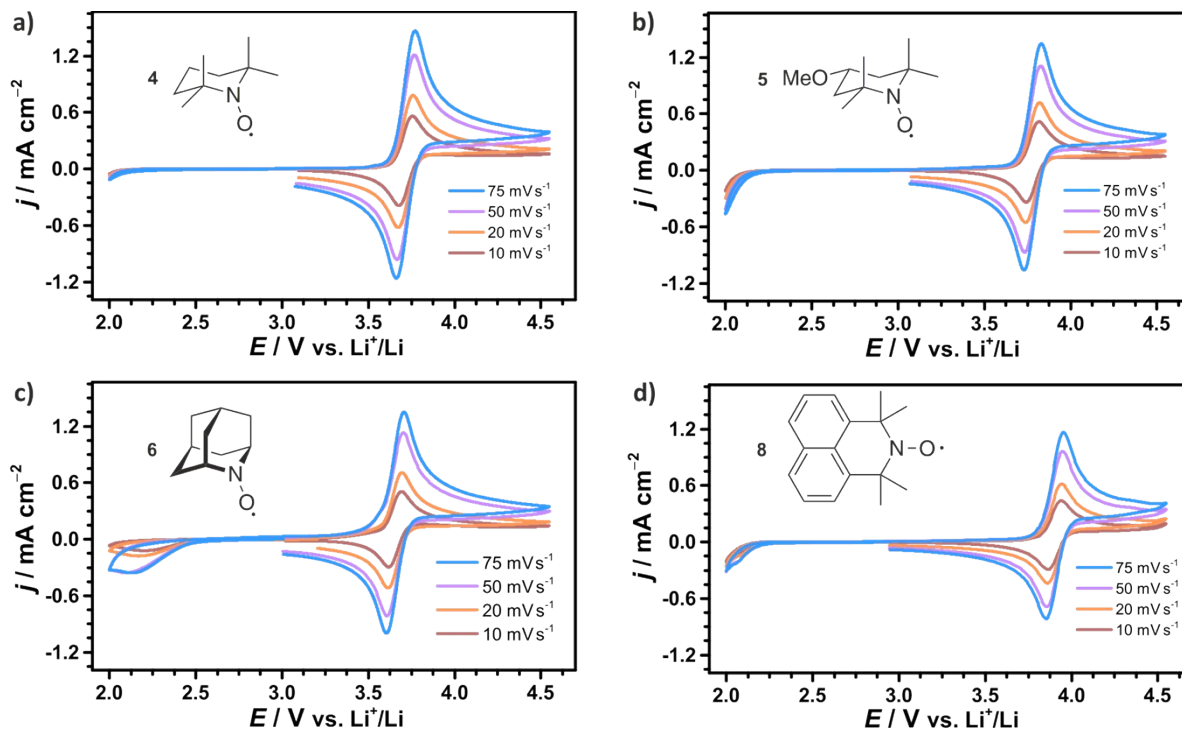

**Fig. S3** Cyclic voltammograms of 10 mM a) TEMPO 4, b) 4-methoxy-TEMPO 5, c) AZADO 6, d) TMAO 8 in 1 M LiTFSI/diglyme using different scan speeds; obtained in a glass cell according to 2.3 under argon atmosphere ( $p = 1$  bar).

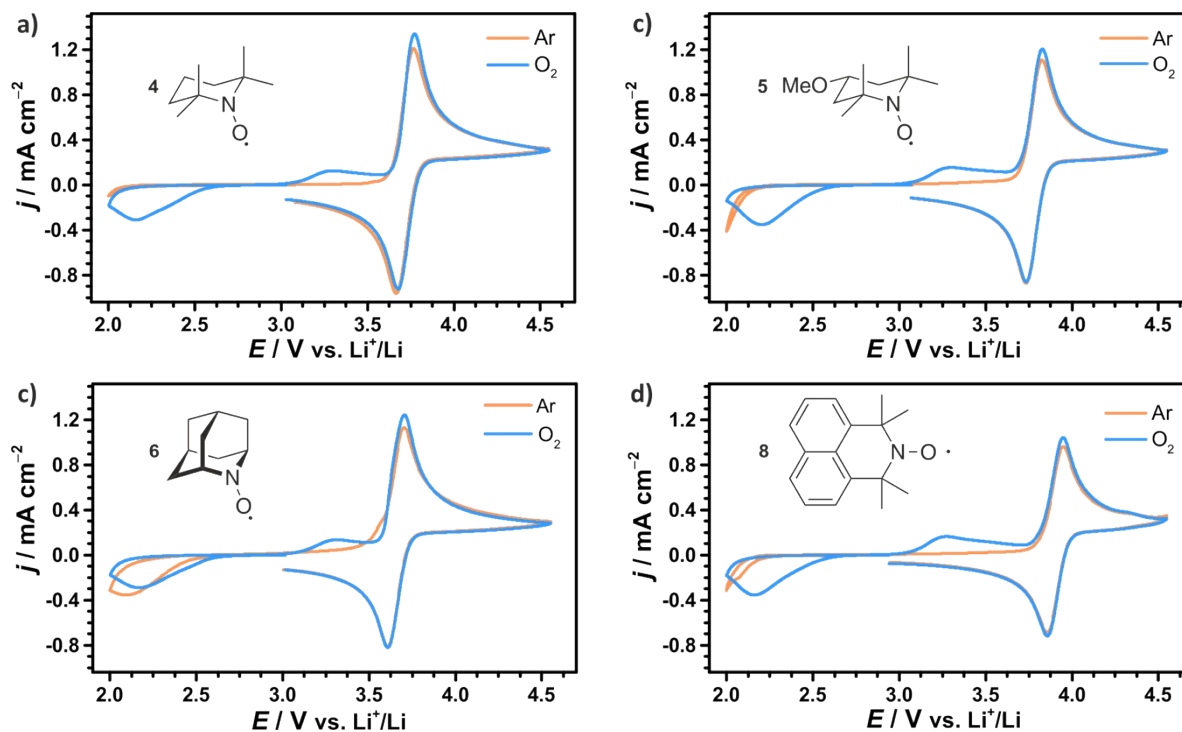

**Fig. S4** Cyclic voltammograms of 10 mM a) TEMPO 4, b) 4-methoxy-TEMPO 5, c) AZADO 6, d) TMAO 8 in 1 M LiTFSI/diglyme under argon and oxygen atmosphere ( $p = 1$  bar); obtained in a glass cell according to 2.3 with a scan speed of 50 mV s<sup>-1</sup>.

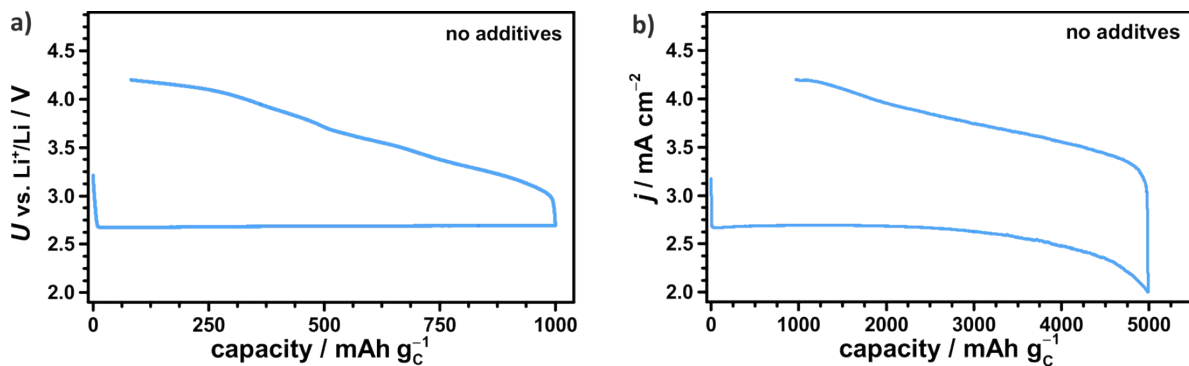

**Fig. S5** Cycling profiles of Li-O<sub>2</sub> cells with 1 M LiTFSI/diglyme using  $j = 0.1 \text{ mA cm}^{-2}$ ,  $p(\text{O}_2) = 1 \text{ bar}$  and **a)** a fixed discharge capacity of  $1000 \text{ mAh g}^{-1}$  or **b)** a fixed discharge cut-off voltage of 2.0 V; a section up to 4.2 V was selected according to the residual Li-O<sub>2</sub> cells with nitroxides, see Fig. S7.

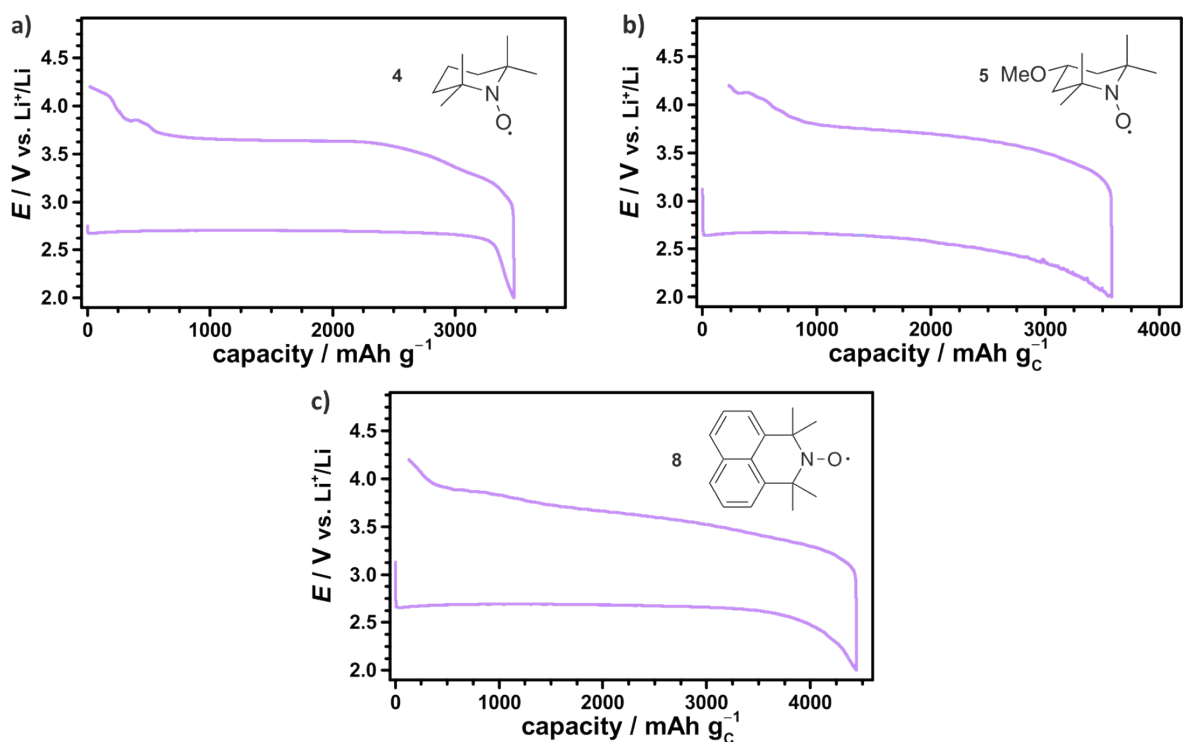

**Fig. S6** Cycling profiles of Li-O<sub>2</sub> cells with 10 mM **a)** TEMPO **4**, **b)** 4-methoxy-TEMPO **5**, **c)** TMAO **8** in 1 M LiTFSI/diglyme; obtained with  $j = 0.1 \text{ mA cm}^{-2}$ ,  $p(\text{O}_2) = 1 \text{ bar}$  and cut-off potentials of 2.0 V resp. 4.2 V vs. Li<sup>+</sup>/Li. The corresponding profile of a Li-O<sub>2</sub> cell with pure 1 M LiTFSI/diglyme is shown in Fig S5b.

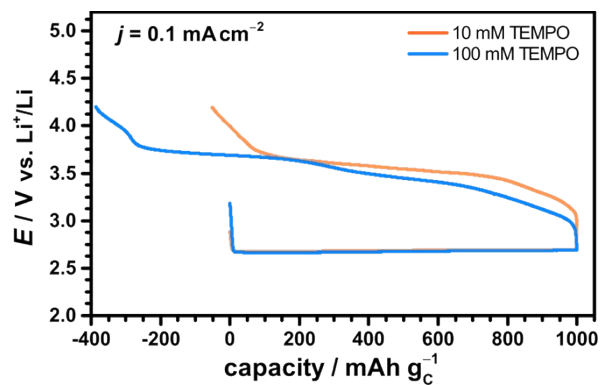

**Fig. S7** Cycling profiles of Li-O<sub>2</sub> cells with 10 mM and 100 mM TEMPO in 1 M LiTFSI/diglyme using  $j = 0.1 \text{ mA cm}^{-2}$ ,  $p(\text{O}_2) = 1 \text{ bar}$  and a fixed discharge capacity of  $1000 \text{ mAh g}_C^{-1}$ .

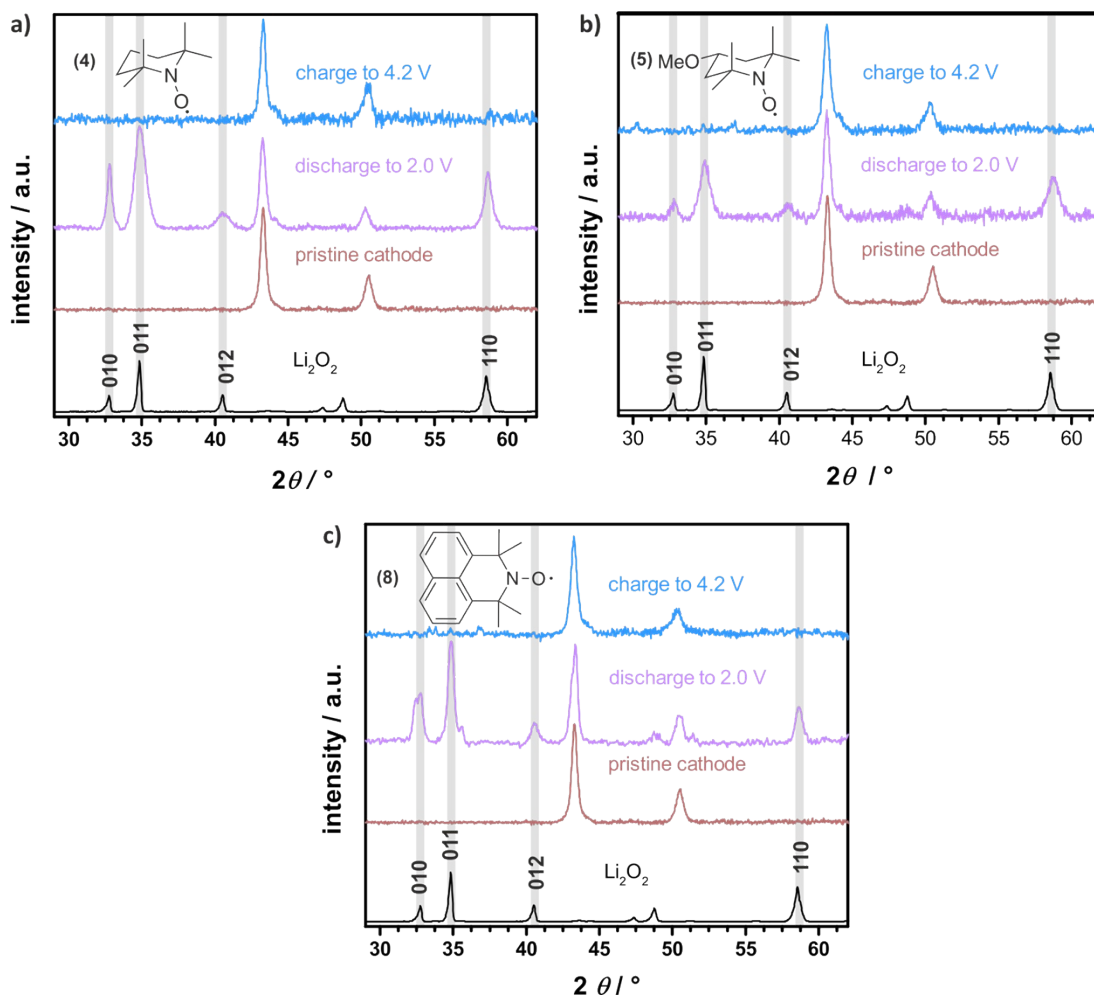

**Fig. S8** XRD patterns of the carbon cathodes after discharge and charge in a Li-O<sub>2</sub> cell with 10 mM **a)** TEMPO **4**, **b)** 4-methoxy-TEMPO **5**, **c)** TMAO **8** in 1 M LiTFSI/diglyme; the corresponding cycling profiles are illustrated in Fig. S6. Li<sub>2</sub>O<sub>2</sub> diffraction pattern matches the typical Li<sub>2</sub>O<sub>2</sub> faces (ICSD 98-018-0557).
